# Supplementary material for: Molecular simulation studies on the design of energetic ammonium dinitramide co-crystals for tuning hygroscopicity
Source: Royal Society of Chemistry journal article supplement (doi:10.1039/d0ce00602e), 2020-01-01
Supplement: d0ce00602e1.pdf [file d0ce00602e1.pdf]

## Supporting Information

### **Molecular simulation studies on the design of energetic ammonium dinitramide co-crystals for tuning hygroscopicity**

Zhongqi Ren<sup>a</sup>, Xinjian Chen<sup>a</sup>, Guojia Yu<sup>a</sup>, Yinglei Wang<sup>b</sup>, Bin Chen<sup>\*b</sup>, and Zhiyong Zhou<sup>\*a</sup>

<sup>a</sup>College of Chemical Engineering, Beijing University of Chemical Technology, Beijing 100029, People's Republic of China

<sup>b</sup>Xi'an Modern Chemistry Research Institute, 168 Zhangba Rd. East, Xi'an 710065, People's Republic of China

\*Corresponding author: zhouzy@mail.buct.edu.cn (Zhiyong Zhou); cb204s@163.com (Bin Chen)

### **Contents**

#### **1. Computational method and details**

#### **2. Figure captions**

##### **2.1 Scatter diagrams of lattice energy and density of co-crystal**

**Figure S1.** Scatter diagrams of lattice energy and density of co-crystal of ADN/CL-20

**Figure S2.** Scatter diagrams of lattice energy and density of co-crystal of ADN/BTF

**Figure S3.** Scatter diagrams of lattice energy and density of co-crystal of ADN/HMX

**Figure S4.** Scatter diagrams of lattice energy and density of co-crystal of ADN/TNT

**Figure S5.** Scatter diagrams of lattice energy and density of co-crystal of ADN/ETN

**Figure S6.** Scatter diagrams of lattice energy and density of co-crystal of ADN/RDX

**Figure S7.** Scatter diagrams of lattice energy and density of co-crystal of ADN/TNB

**Figure S8.** Scatter diagrams of lattice energy and density of co-crystal of ADN/MATNB

**Figure S9.** Scatter diagrams of lattice energy and density of co-crystal of ADN/TNAZ

## 2.2 Predictive packing diagrams of co-crystals

**Figure S10.** Predictive packing diagrams of ADN/CL-20 co-crystal

**Figure S11.** Predictive packing diagrams of ADN/BTF co-crystal

**Figure S12.** Predictive packing diagrams of ADN/HMX co-crystal

**Figure S13.** Predictive packing diagrams of ADN/TNT co-crystal

**Figure S14.** Predictive packing diagrams of ADN/ETN co-crystal

**Figure S15.** Predictive packing diagrams of ADN/RDX co-crystal

**Figure S16.** Predictive packing diagrams of ADN/TNB co-crystal

**Figure S17.** Predictive packing diagrams of ADN/MATNB co-crystal

**Figure S18.** Predictive packing diagrams of ADN/TNAZ co-crystal

## 2.3 The lowest energy water sorption frames of co-crystal surfaces

**Figure S19.** The lowest energy water sorption frames of (1 0 0), (0 1 0), (0 0 1) ADN/CL-20 co-crystal surfaces

**Figure S20.** The lowest energy water sorption frames of (1 0 0), (0 1 0), (0 0 1) ADN/BTF co-crystal surfaces

**Figure S21.** The lowest energy water sorption frames of (1 0 0), (0 1 0), (0 0 1) ADN/HMX co-crystal surfaces

**Figure S22.** The lowest energy water sorption frames of (1 0 0), (0 1 0), (0 0 1) ADN/TNT co-crystal surfaces

**Figure S23.** The lowest energy water sorption frames of (1 0 0), (0 1 0), (0 0 1) ADN/ETN co-crystal surfaces

**Figure S24.** The lowest energy water sorption frames of (1 0 0), (0 1 0), (0 0 1) ADN/RDX co-crystal surfaces

**Figure S25.** The lowest energy water sorption frames of (1 0 0), (0 1 0), (0 0 1) ADN/TNB co-crystal surfaces

**Figure S26.** The lowest energy water sorption frames of (1 0 0), (0 1 0), (0 0 1) ADN/MATNB co-

crystal surfaces

**Figure S27.** The lowest energy water sorption frames of (1 0 0), (0 1 0), (0 0 1) ADN/TNAZ co-crystal surfaces

### **3. Table captions**

**Table S1.** ADN and selected guests' detonation properties

**Table S2.** The computational details of oxygen balance after 1:1 cocrystallization

**Table S3.** The computational details of water sorption capacity and sorption heat on ADN basic crystal faces and co-crystal faces

**Table S4.** The computational details of the interaction between water molecule and crystal surface

**Table S5.** The parameters and value of the interaction site pairing energy difference of ADN/DPO based on virtual co-crystal screening method

### **4. Calculations related to ADN/18C6 co-crystal**

**Figure S28.** Scatter diagrams of lattice energy and density of co-crystal of ADN/18C6

**Figure S29.** The predictive crystal structure of ADN/18C6

**Table S6.** The computational and experimental crystal parameters, density of ADN/18C6

**Table S7.** Water sorption capacity and adsorption heat ADN/18C6 co-crystal basic faces

**Table S8.** The computational details of the interaction between water molecule and ADN/18C6 co-crystal surface

**Table S9.** The parameters and value of the interaction site pairing energy difference of ADN/18C6 based on virtual co-crystal screening method

### **5. Predicted ADN/CL-20, ADN/HMX, ADN/18C6 co-crystal morphology by BFDH method and water total sorption capacity**

**Table S10.** Results of ADN/CL-20, ADN/HMX, ADN/18C6 co-crystal morphology by the BFDH method.

**Table S11.** The computational water sorption capacity of ADN/CL-20, ADN/HMX, ADN/18C6 co-crystal surface

## 6. References

### 1. Computational method and details

#### 1.1 Initial selection and the molecular structures of energetic materials

Selection of energetic materials co-former needs multi-aspect consideration. High performance and low sensitivity usually are a standard of assessing energetic materials. Because of lack of research on hygroscopicity of energetic materials, some common explosives were selected as the co-formers, due to their relatively mature preparation technologies.

Nine energetic materials (EMS) containing CL-20, BTF, HMX, TNT, ETN, RDX, TNB, MATNB and TNAZ were selected as co-crystal co-formers. Fig. 1 shows molecular structures of nine selected energetic materials, which can be classified as different types according to molecular structures. The selected molecular structure types include linear structure, cyclic structure and cage-like structure. A series of their properties including density, detonation velocity ( $V_d$ ), detonation pressure ( $P_d$ ), oxygen balance (OB), oxygen balance after 1:1 co-crystallization (OBAC) and gas formed by 1 g energetic materials at pressure of 1 bar ( $V_{gas}$ ) are listed in Table S1.<sup>1-4</sup> The OB and OBAC values can be calculated by Eq.1.

$$OB = \frac{[c - (2a + b/2)]}{M_r} \times 16 \times 100\% \quad (1)$$

where  $a$ ,  $b$  and  $c$  are the numbers of C, H and O atoms in one molecule, respectively,  $M_r$  represents the relative molecular mass. The details of calculating oxygen balance after forming 1:1 co-crystallization are shown in Table S2 in the Supporting Information.

Some energetic materials like RDX and HMX have been used as components of propellants.<sup>5,6</sup> Compared with these energetic materials, it is easy to find that ADN as a propellant component has advantages of higher OB and  $V_{gas}$ . However, how to improve ADN hygroscopicity and estimate water sorption capacity of energetic co-crystal materials are the highlights in this work.

#### 1.2 Molecular electrostatic potential calculations of ADN and co-crystal guests.

The molecular electrostatic potential surfaces (MEPS) of the component molecules of interest are usually employed to understand the molecular packing in their co-crystals.<sup>7-9</sup> In the rules of crystal packing, the place with positive electrostatic potential of one molecule combines with the place at where there is negative electrostatic potential of the other molecule. The electrostatic potential ( $V(r)$ ) that the nuclei and electron in a molecule create at any point  $r$  in the surrounding space is given by Eq. 2.<sup>10</sup>

$$V(r) = \sum_A \frac{Z_A}{|R_A - r|} - \int \frac{\rho(r') dr'}{|r' - r|} \quad (2)$$

where  $Z_A$  is the charge on nucleus A, which is located at  $R_A$ ,  $\rho(r)$  is the electronic density of molecule. The surface which reflects the specific features of each molecule can be defined as the  $\rho(r)$  contours.<sup>10</sup>

By calculating the MEPS, intermolecular H-bonding sites and N-H...O supramolecular synthon can be found in ADN co-crystals. The functional GGA-BLYP and the basis set DNP-3.5 were used for geometry optimization in Dmol3 module. The selected properties were electron density and electrostatics. At last, transparency of electrostatic potential was adjusted to make

the presentation clearer.

### 1.3 Prediction of possible co-crystal lattice structure

The properties of a material depend very sensitively on its structure.<sup>11</sup> The properties of crystal materials depend on not only molecular structure but also co-crystal lattice structure. The prediction calculations of co-crystals' structures were based on Monte Carlo method.

First, intermolecular structure optimization needs multiple tentative calculations, in which relative position also changes. After multiple optimizations of co-crystal intermolecular structure, minimum lattice energy can be obtained. In this section, the mode of co-crystal interaction is mainly between  $\text{NH}_4^+$  of ADN and oxygen atoms of co-crystal guest, according to previous calculation results of molecular electrostatic potential.

Then, the polymorph predictive method was used to simulate co-crystal lattice structures and a large amount of crystal structures were obtained. The lattice energy and co-crystal density values were calculated by placing the relative positions of molecules in the crystal cell continuously. This method can well predict the crystal space group, and obtain the predictive crystal cell parameters, H-bonding energy, lattice energy and co-crystal density.

Since the Dreiding force field, as a generic force field, can well describe interaction between ADN and other energetic molecules,<sup>12,13</sup> the Dreiding force field was used in the molecular structures and crystal structures optimization processes. Medium quality, clustering option and atom-based summation method was selected. Explore torsion degree of freedom and the Pre-optimization were set to get accurate structures. Ten space groups including P-21/C, P-1, P212121, C2/C, P21, PBCA, PNA21, CC, PBCN and C2 were selected. The H-bond energy term in the Dreiding force field is given by Eq. 3.

$$E_{\text{hb}} = D_{\text{hb}} \left[ 5 \left( R_{\text{hb}} / R_{\text{DA}} \right)^{12} - 6 \left( R_{\text{hb}} / R_{\text{DA}} \right)^{10} \right] \cos^4 \left( \theta_{\text{DHA}} \right) \quad (3)$$

Where  $\theta_{\text{DHA}}$  is the bond angle between the hydrogen donor (D), the hydrogen (H), and the hydrogen acceptor (A), where  $R_{\text{DA}}$  is the distance between the donor and acceptor atoms. The values of  $D_{\text{hb}}$  and  $R_{\text{hb}}$  depend on the convention for assigning charges.

Most researchers are inclined to think that the lowest crystal lattice energy is the rule of selecting crystal structure, and the crystals with the lowest lattice energy are thermodynamically most stable compared with crystals of other structures.<sup>14</sup> In some cases, the maximum density of crystal structure is equal to the lowest energy of crystal structure.<sup>15</sup> What needs to be emphasized is that the selected structure by crystal structure prediction may be inaccurate compared with the experimental values. The experimental structure is hidden generally amongst the 100 or so lowest-energy structures.<sup>16,17</sup> However, it is convenience to build and select one co-crystal structure from more than two thousand structures for one kind of co-crystals.

### 1.4 Water sorption capacity on co-crystal surface

In our previous work,<sup>18</sup> water sorption capacity of ADN crystal has been studied, and the computational results were in good agreement with the experimental ones. The calculation parameters as well as the calculation method of this section are as same as those reported in our previous work. Water sorption capacity calculations have its origins in "adsorbed phase" defined by Gibbs.<sup>19</sup> Gibbs defined the "adsorbed phase" as the actual amount of gas minus the amount of gas which would be presented in the same space at the prevailing bulk density of the gas to avoid the question: how close to the surface must a molecule be in order to be classified as adsorbed. Saturated adsorption capacity was calculated by Eq.4

$$n_{\text{ex}} = n_{\text{ab}} - \rho_{\text{g}} V_{\text{a}} \quad (4)$$

where  $n_{\text{ex}}$  is the saturated adsorption capacity,  $n_{\text{ab}}$  is called as the absolute adsorption capacity,  $\rho_{\text{g}}$  is the density of the equilibrium gas phase, and  $V_{\text{a}}$  is the volume of adsorbed phase.

The  $2 \times 2 \times 2$  ADN or co-crystals supercell was cleaved with 1.0 fractional thickness to create

the required surfaces. The (100), (010) and (001) crystal faces, which are called basic crystal faces, are common and simple crystal surfaces. Basic crystal faces are with low indices of crystal face and important parts of crystal surfaces. To avoid the additional free boundary effect, a 10 Å vacuum slab and repetitive unit were added by constructing 1 × 1 × 2 supercell. At last, excessive vacuum slabs were removed by adjusting crystal lattice parameters. The middle part of the model is vacuum slab on behalf of the region of wet air, which is shown in Figure S10-S18 in the Supporting Information. The water sorption capacity of ADN increases with the increase of temperature and propellants are sometimes used under harsh conditions. Therefore, the condition was set as 308.15 K and 50% relative humidity to compare performance of resisting water sorption. The ensemble was  $\mu VT$ , in which the chemical potential  $\mu$ , volume  $V$ , and temperature  $T$  are constant in the simulation process. The Dreiding force field with the Gasteiger charges, Ewald and atom-based summation methods for electrostatic and van der Waals interactions, respectively, were employed to calculate water sorption heat.

Since the hygroscopicity of crystal is dominated by the crystal surface, the hygroscopicity of co-crystal must be different from pure crystal. Comparing water sorption capacity and water sorption heat of different co-crystals, the hygroscopicity of different co-crystals can be estimated.<sup>18,20</sup> The model and calculation parameters can be used to predict other ADN-based energetic co-crystal materials. It is convenient and quick to predict crystal hygroscopicity without experiment, which can speed up the research and development of new energetic co-crystal materials for tuning physical properties.

### 1.5 The interaction between water molecule and crystal surface

The interaction between water molecule and crystal surface can be investigated by molecular mechanics simulations.<sup>21</sup> Based on computational results of water sorption capacity, the co-crystals with low water sorption capacity such as CL-20/ADN, HMX/ADN, 18C6/ADN are used to investigate the interaction between water molecule and crystal surface and verify the reliability of water sorption capacity calculations. The calculation method is as follow. Create 2×2×2 supercell, cleave (1 0 0), (0 1 0) and (0 0 1) crystal surface, and add a vacuum layer of 30 Angstroms, add one water molecule in the vacuum layer, constrain the crystal plane. Forcite optimization is used to optimize the structure of the model. use Dreiding force field and Gasteiger calculation method. For the electrostatic force, the Ewald statistical accuracy is 0.00001 kcal/mol and 0.5 Angstrom is as the edge width. For the van der Waals force, a statistical method based on atoms is used, the truncation radius is set as 18.5 Angstroms, the total energy convergence is set to 1.0e<sup>-4</sup> kcal/mol, and the force convergence is set to 0.005 kcal/mol/Å. Due to the uneven surface of the crystal, the  $E_{int}$  may have different forces in different surface location. Therefore, the place on adding water molecule is set randomly in three time. Then take the average of  $E_{int}$ . The energy formula of the surface of the material and the water molecules is given by Eq. 5.

$$E_{int} = E_{surf+water} - E_{surf} - E_{water} \quad (5)$$

The  $E_{int}$ ,  $E_{surf+water}$ ,  $E_{surf}$  and  $E_{water}$  refer to the interaction between water molecule and crystal surface, the energy of crystal surface, the energy of crystal surface, the energy of water molecule respectively.

### 1.6 Virtual co-crystal screening calculations

Although many possible co-formers may have a good effect on reducing the water sorption capacity of ADN crystal, an important question has been proposed: “Whether all possible co-crystals can be formed experimental successfully?”. Virtual co-crystal screening as a prediction tool is used to understand co-crystal formation and molecular interaction, which has been experimentally verified.<sup>22,23</sup> The virtual co-crystal which assume some rules of co-crystal formation is a promising tool for focusing experimental efforts on the most promising crystal formers candidates. Firstly, Etters’ rule assumes two most polar interaction sites can be paired very likely.<sup>24,25</sup> Secondly, the energy between co-formers of co-crystal determines probability of

co-crystal formation. Thirdly, without attention for details of crystal packing, the potential interaction sites of two-dimensional structures are major consideration.

Based on molecular electrostatic potential surfaces of two-dimensional structures which is used to identify a discrete set of surface site interaction points, the value of the interaction site pairing energy difference  $\Delta E$  as an important sign gives a good prediction result. Large surveys of co-crystals demonstrate that the co-crystals which can be formed must be more stable than the pure crystals. The high  $\Delta E$  leads to the strong interactions between the two different components and formation of co-crystals is a high probability event.

$$E = -\sum_{ij} \alpha_i \beta_j \quad (6)$$

Where  $E$  is the interaction site pairing energy, and  $\alpha_i$  are the H-bond donor parameters, and  $\beta_j$  are the H-bond acceptor parameters, and the sum represents the sum over all appropriately paired interaction sites.

$$\alpha = 0.0000162MEP_{\max}^2 + 0.00962MEP_{\max} \quad (7)$$

$$\beta = 0.000146MEP_{\min}^2 - 0.00930MEP_{\min} \quad (8)$$

where  $MEP_{\min}$  and  $MEP_{\max}$  are local minima and maxima on the MEPS in kJ/mol.

$$\Delta E = E_{cc} - nE_1 - mE_2 \quad (9)$$

where  $E_1$  is the interaction site pairing energy of the pure form of component 1,  $E_2$  is the interaction site pairing energy of the pure form of component 2,  $E_{cc}$  is the interaction site pairing energy of the co-crystal of stoichiometry 1n2m. As our research assumed, ADN and formers can be formed as the stoichiometry 1:1. Therefore, the parameters n, m in Eq.9 are set as 1.

$$P = \frac{e^{-(\Delta E+11)/(RT)}}{1 + e^{-(\Delta E+11)/(RT)}} \quad (10)$$

The Eq.10 is fitted from the caffeine and carbamazepine co-crystal data. When the  $-\Delta E$  of co-crystals are more than 11kJ/mol, it is 50% probability that the co-crystals can be formed.<sup>22</sup> When  $\Delta E$  are less than 0 kJ/mol, the co-crystals are inaccessible formed from the view of stability and thermodynamics. The larger  $-\Delta E$  is, the more likely possibility of co-crystal formation is. Owe to uncertain experimental formation stoichiometry, the positive-negative judgment is used to evaluate the possibility of co-crystals and the P value is not given in the text.

## 2. Figure captions

### 2.1 Scatter diagrams of lattice energy and density of co-crystal

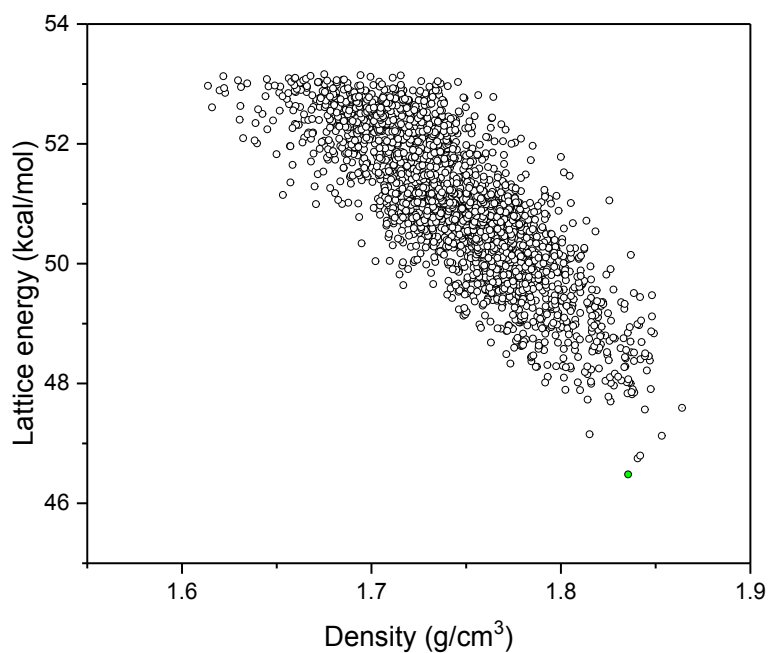

**Figure S1.** Scatter diagrams of lattice energy and density of co-crystal of ADN/CL-20

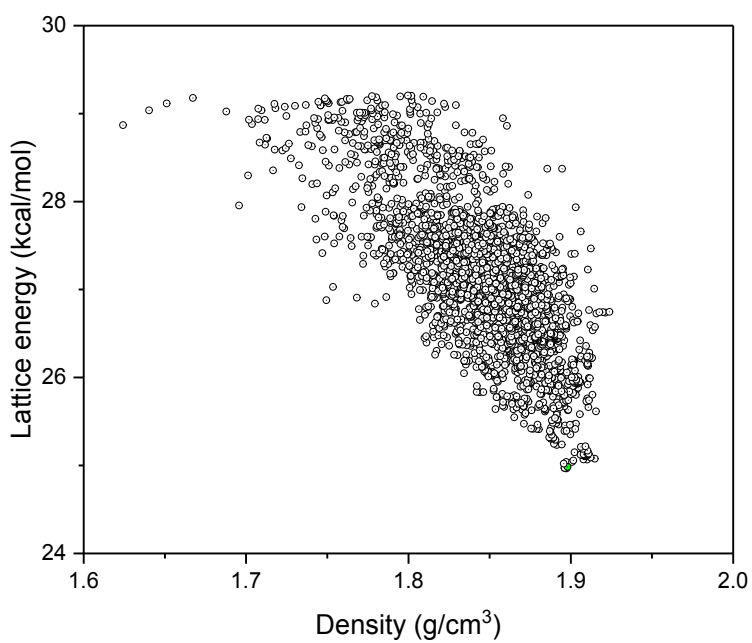

**Figure S2.** Scatter diagrams of lattice energy and density of co-crystal of ADN/BTF



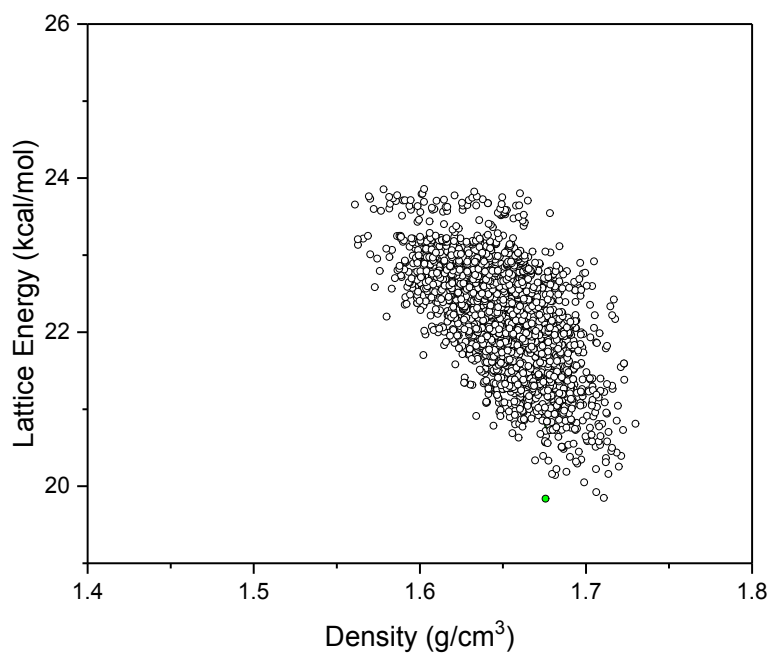

**Figure S3.** Scatter diagrams of lattice energy and density of co-crystal of ADN/HMX

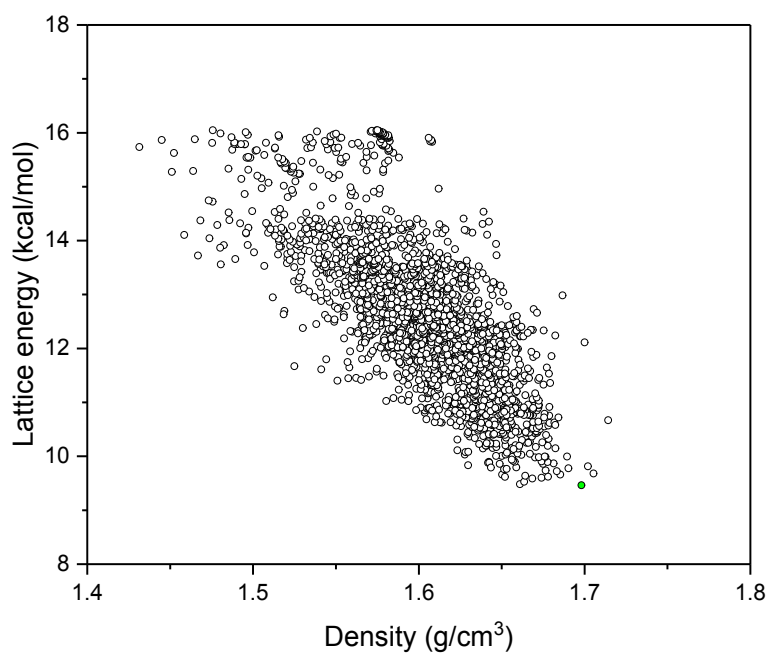

**Figure S4.** Scatter diagrams of lattice energy and density of co-crystal of ADN/TNT

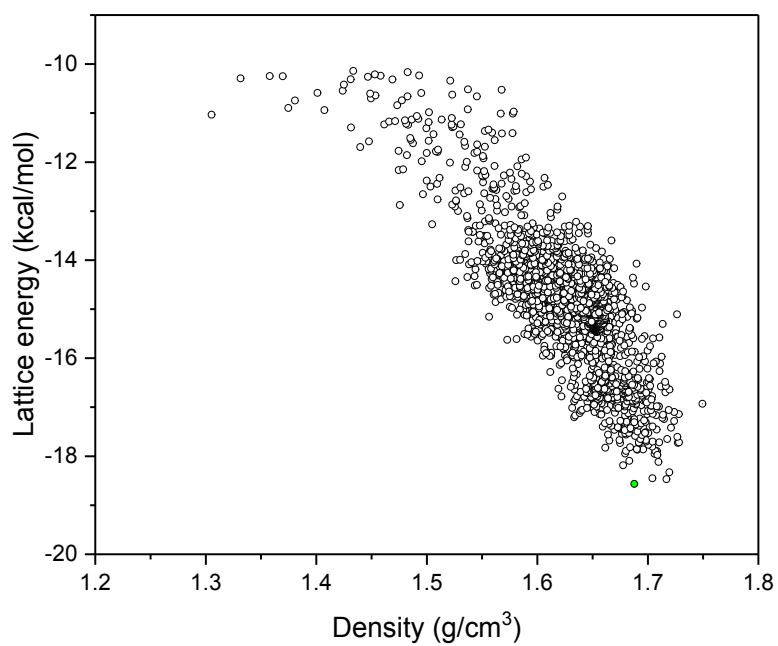

**Figure S5.** Scatter diagrams of lattice energy and density of co-crystal of ADN/ETN

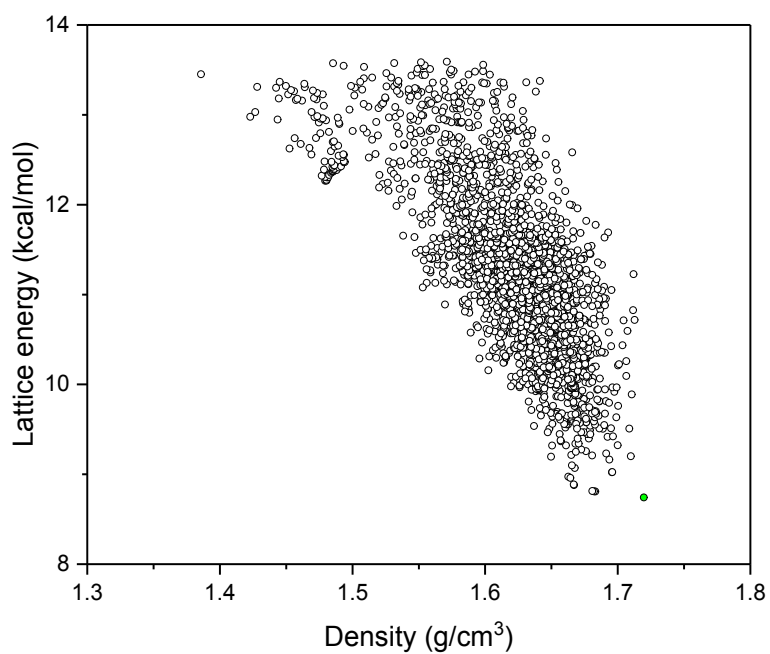

**Figure S6.** Scatter diagrams of lattice energy and density of co-crystal of ADN/RDX

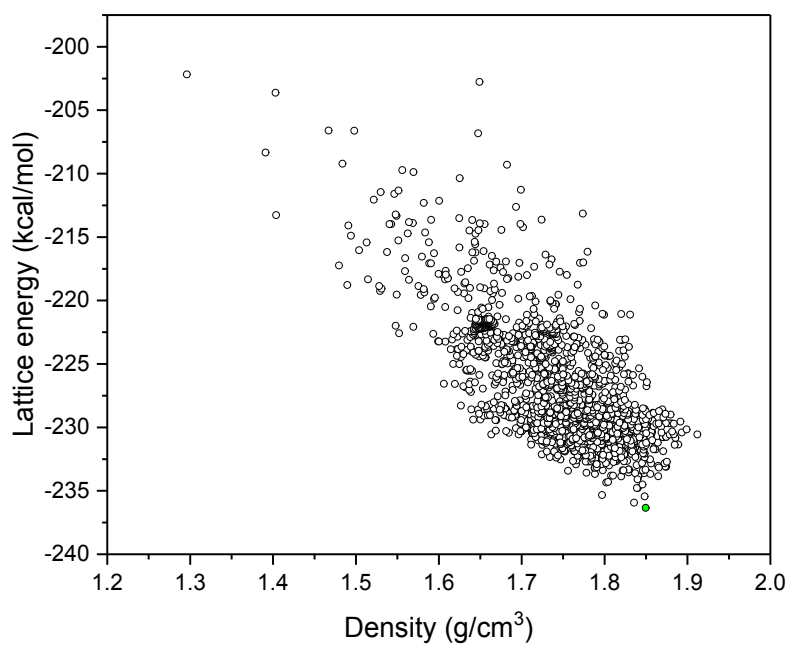

**Figure S7.** Scatter diagrams of lattice energy and density of co-crystal of ADN/TNB

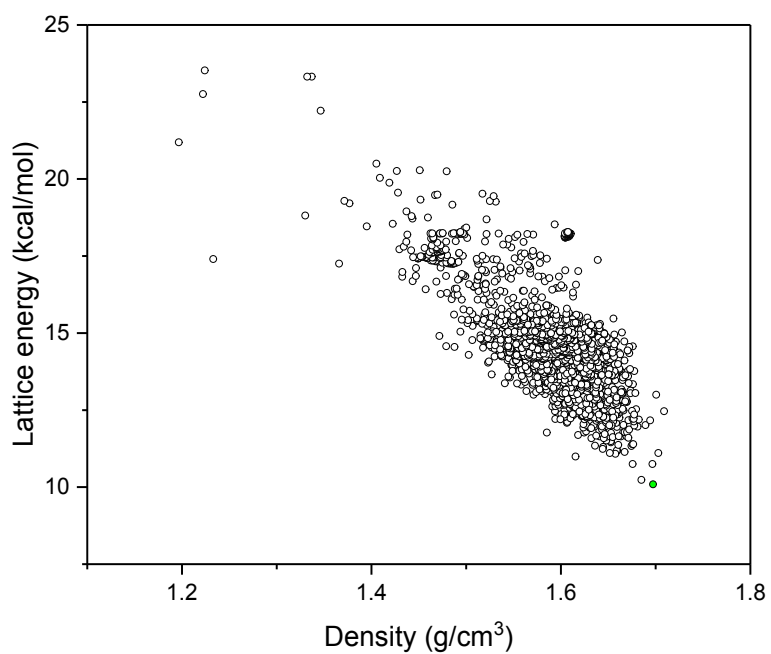

**Figure S8.** Scatter diagrams of lattice energy and density of co-crystal of ADN/MATNB

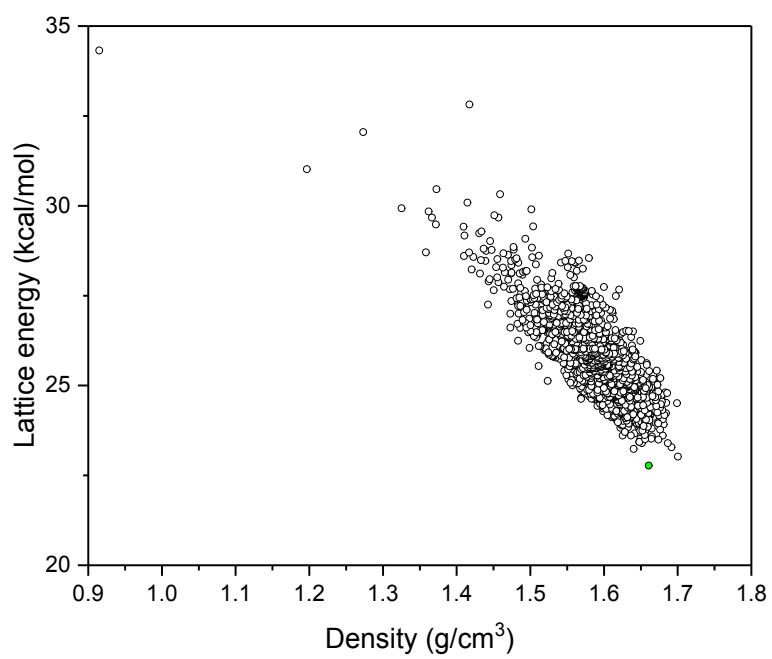

**Figure S9.** Scatter diagrams of lattice energy and density of co-crystal of ADN/TNAZ

## 2.2 Predictive packing diagrams of co-crystals

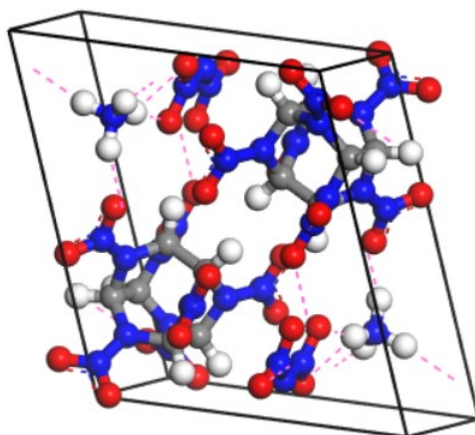

**Figure S10.** Predictive packing diagrams of ADN/CL-20 co-crystal

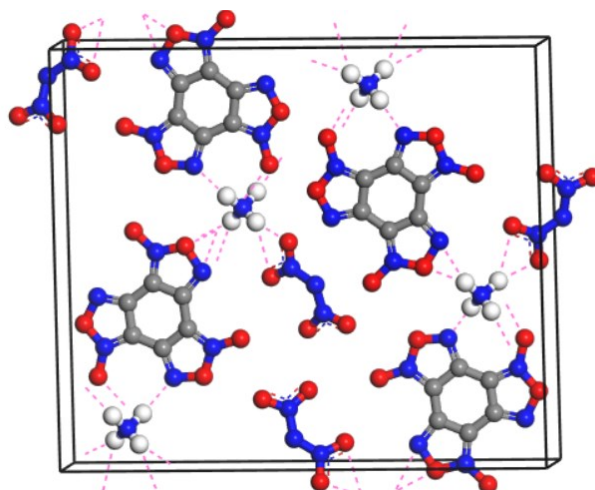

**Figure S11.** Predictive packing diagrams of ADN/BTF co-crystal

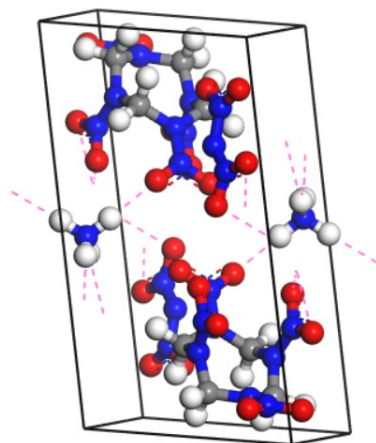

**Figure S12.** Predictive packing diagrams of ADN/HMX co-crystal

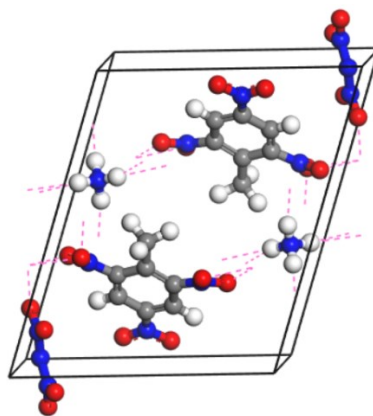

**Figure S13.** Predictive packing diagrams of ADN/TNT co-crystal

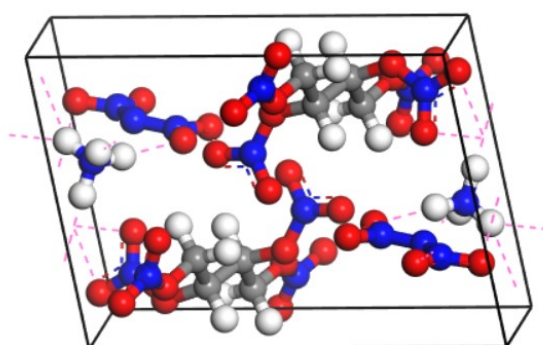

**Figure S14.** Predictive packing diagrams of ADN/ETN co-crystal

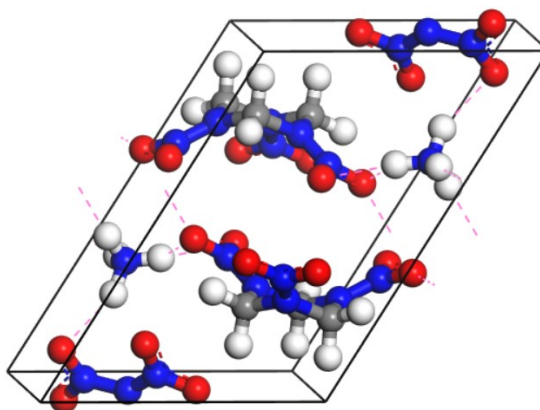

**Figure S15.** Predictive packing diagrams of ADN/RDX co-crystal

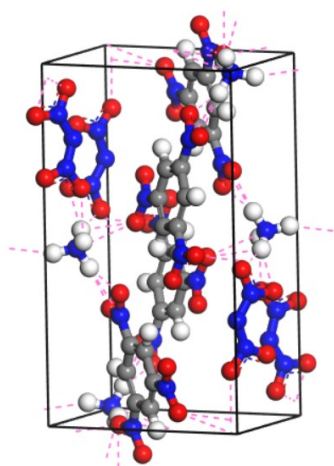

**Figure S16.** Predictive packing diagrams of ADN/TNB co-crystal

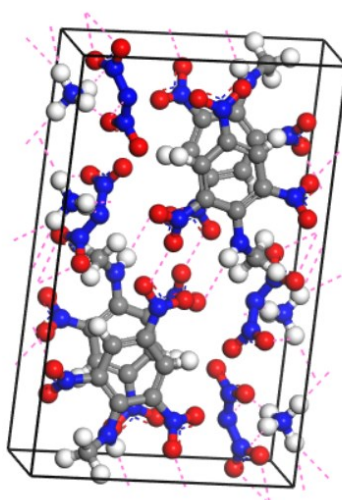

**Figure S17.** Predictive packing diagrams of ADN/MATNB co-crystal

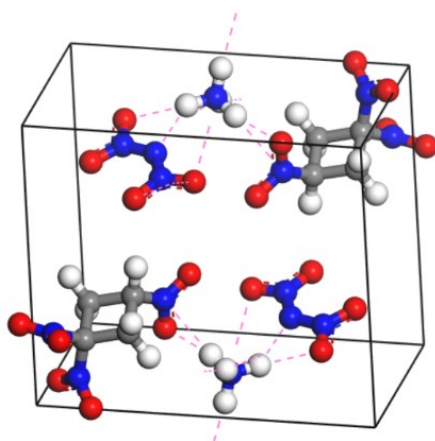

**Figure S18.** Predictive packing diagrams of ADN/TNAZ co-crystal



### 2.3 The lowest energy water sorption frames of co-crystal surfaces

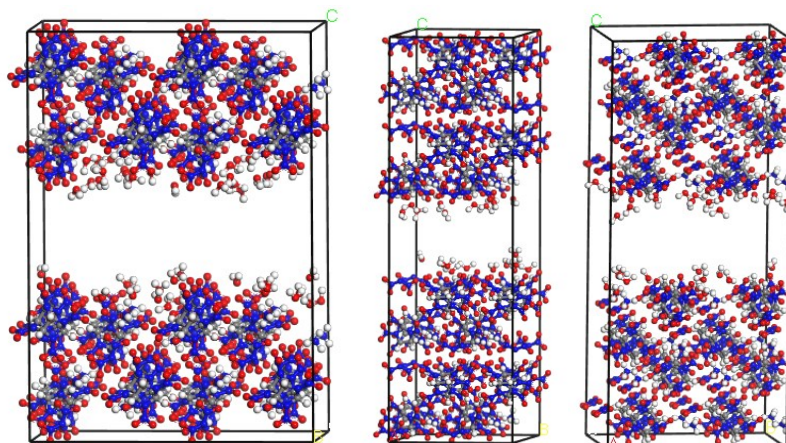

**Figure S19.** The lowest energy water sorption frames of (1 0 0), (0 1 0), (0 0 1) ADN/CL-20 co-crystal surfaces

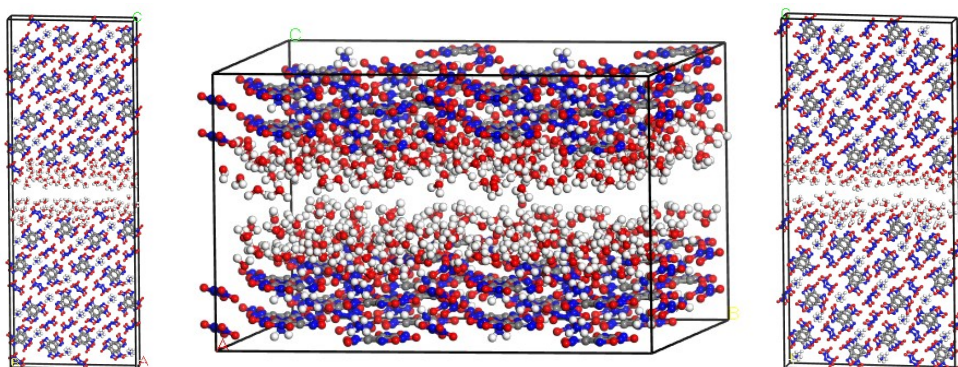

**Figure S20.** The lowest energy water sorption frames of (1 0 0), (0 1 0), (0 0 1) ADN/BTF co-crystal surfaces

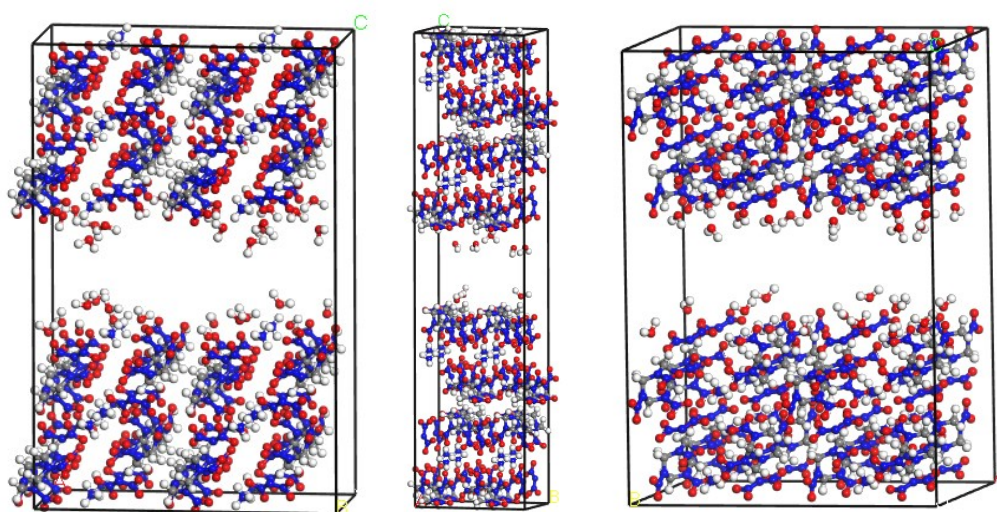

**Figure S21.** The lowest energy water sorption frames of (1 0 0), (0 1 0), (0 0 1) ADN/HMX co-



crystal surfaces

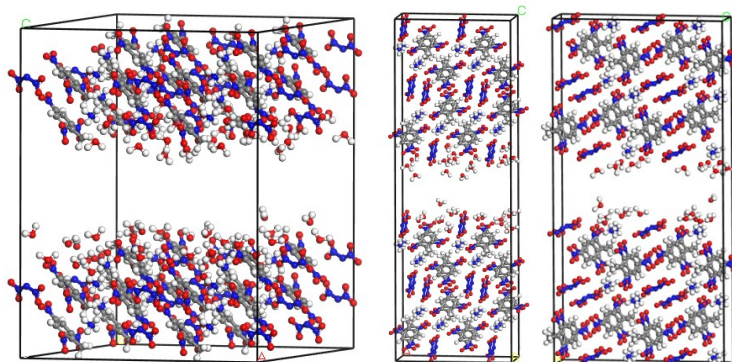

**Figure S22.** The lowest energy water sorption frames of (1 0 0), (0 1 0), (0 0 1) ADN/TNT co-crystal surfaces

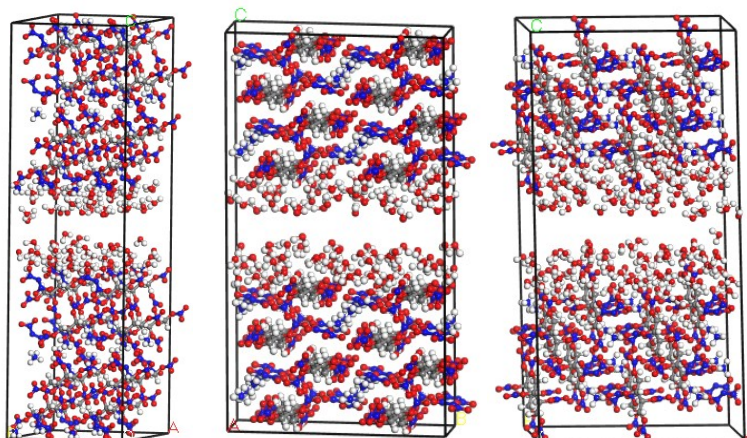

**Figure S23.** The lowest energy water sorption frames of (1 0 0), (0 1 0), (0 0 1) ADN/ETN co-crystal surfaces

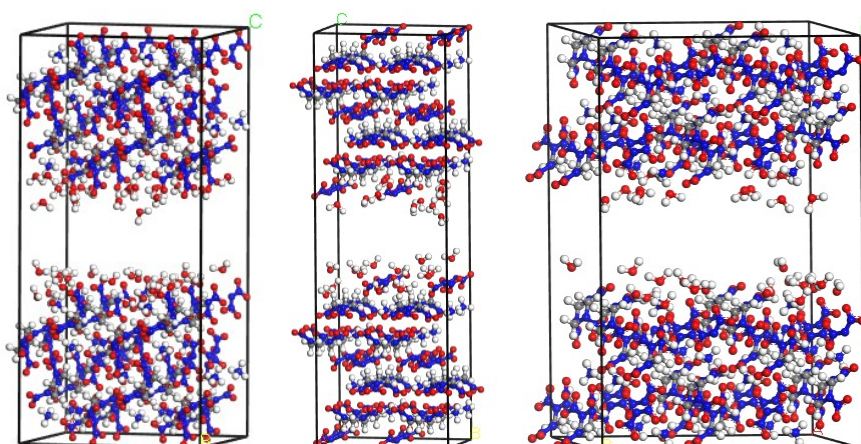

**Figure S24.** The lowest energy water sorption frames of (1 0 0), (0 1 0), (0 0 1) ADN/RDX co-crystal surfaces

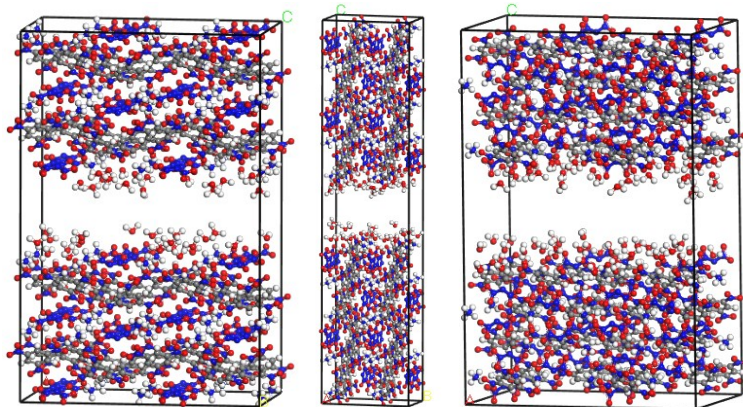

**Figure S25.** The lowest energy water sorption frames of (1 0 0), (0 1 0), (0 0 1) ADN/TNB co-crystal surfaces

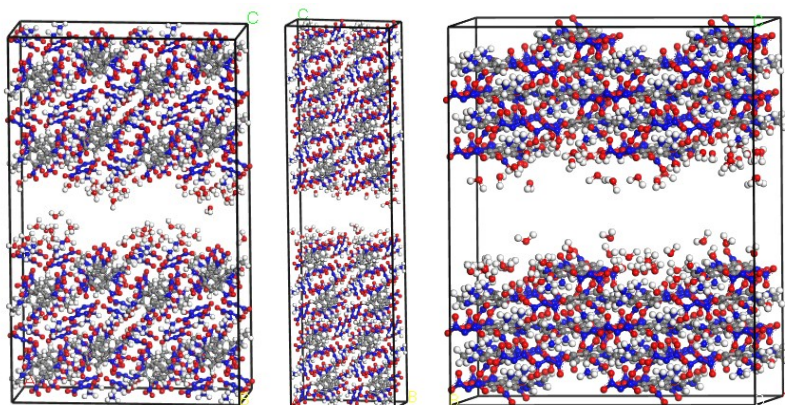

**Figure S26.** The lowest energy water sorption frames of (1 0 0), (0 1 0), (0 0 1) ADN/MATNB co-crystal surfaces

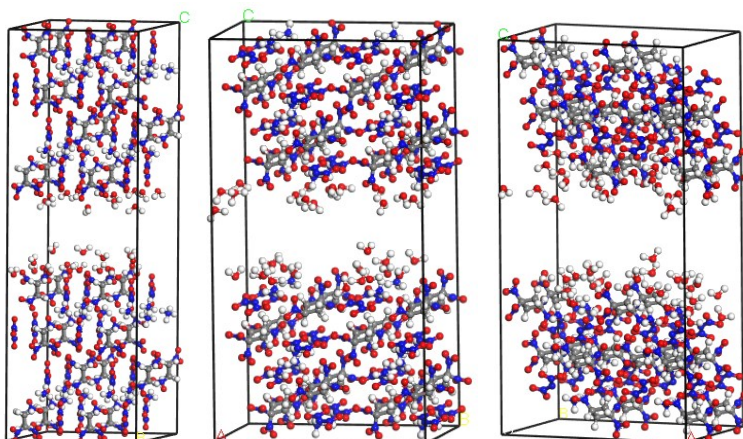

**Figure S27.** The lowest energy water sorption frames of (1 0 0), (0 1 0), (0 0 1) ADN/TNAZ co-crystal surfaces

### 3. Table captions

**Table S1.** ADN and selected guests' detonation properties<sup>1-4</sup>

| Energetic Materials | Density (g/cm <sup>3</sup> ) | V <sub>d</sub> (km/s) | P <sub>d</sub> (GPa) | OB (%)              | OBAC (%) | V <sub>gas</sub> (cm <sup>3</sup> /g) |
|---------------------|------------------------------|-----------------------|----------------------|---------------------|----------|---------------------------------------|
| ADN                 | 1.81 <sup>1</sup>            | 8.07 <sup>c1</sup>    | 23.72 <sup>c1</sup>  | 25.8 <sup>1</sup>   |          | 987 <sup>1</sup>                      |
| CL-20(ε)            | 2.04 <sup>1</sup>            | 9.66 <sup>e1</sup>    | 42.0 <sup>c2</sup>   | -11.0 <sup>1</sup>  | -2.85    | 827 <sup>1</sup>                      |
| BTF                 | 1.86 <sup>2</sup>            | 8.5 <sup>e2</sup>     | 36.0 <sup>e2</sup>   | -38.1 <sup>2</sup>  | -17.02   | 360 <sup>2</sup>                      |
| HMX                 | 1.91 <sup>1</sup>            | 9.32 <sup>c1</sup>    | 39.63 <sup>c1</sup>  | -21.6 <sup>1</sup>  | -7.62    | 886 <sup>1</sup>                      |
| TNT                 | 1.65 <sup>1</sup>            | 6.88 <sup>e1</sup>    | 19.53 <sup>e1</sup>  | -74.0 <sup>1</sup>  | -38.73   | 738 <sup>1</sup>                      |
| ETN                 | 1.70 <sup>3</sup>            | 8.03 <sup>e3</sup>    | -                    | 5.3 <sup>4</sup>    | 11.26    | 704 <sup>3</sup>                      |
| RDX                 | 1.82 <sup>1</sup>            | 8.98 <sup>c1</sup>    | 35.17 <sup>c1</sup>  | -21.6 <sup>1</sup>  | -4.62    | 903 <sup>1</sup>                      |
| TNB                 | 1.69 <sup>2</sup>            | 7.42 <sup>e4</sup>    | 26.03 <sup>e4</sup>  | -56.3 <sup>4</sup>  | -26.10   | 600 <sup>4</sup>                      |
| MATNB               | 1.68 <sup>4</sup>            | -                     | -                    | -72.68 <sup>4</sup> | -39.32   | -                                     |
| TNAZ                | 1.84 <sup>1</sup>            | 9.01 <sup>c1</sup>    | 36.37 <sup>c1</sup>  | -16.7 <sup>1</sup>  | -12.69   | 877 <sup>1</sup>                      |

Notes: V<sub>d</sub>: detonation velocity. P<sub>d</sub>: detonation pressure, OB: oxygen balance. OBAC: oxygen balance after 1:1 cocrystallization. V<sub>gas</sub>: gas formed by 1 g energetic materials at pressure of 1 bar. The c represents the computational values. The e represents experimental values.

**Table S2.** The computational details of oxygen balance after 1:1 cocrystallization

| co-crystal materials | a | b  | c  | N  | M <sub>r</sub> | oxygen balance |
|----------------------|---|----|----|----|----------------|----------------|
| ADN/CL-20            | 6 | 10 | 16 | 17 | 562.06         | -2.85          |
| ADN/BTF              | 6 | 4  | 10 | 11 | 376.06         | -17.02         |
| ADN/HMX              | 4 | 12 | 12 | 13 | 420.21         | -7.62          |
| ADN/TNT              | 7 | 9  | 10 | 8  | 351.19         | -38.73         |
| ADN/ETN              | 4 | 10 | 16 | 9  | 426.16         | 11.26          |
| ADN/RDX              | 3 | 10 | 10 | 11 | 346.17         | -4.62          |
| ADN/TNB              | 6 | 7  | 10 | 8  | 337.16         | -26.10         |
| ADN/MATNB            | 7 | 10 | 10 | 9  | 366.20         | -39.32         |
| ADN/TNAZ             | 4 | 9  | 10 | 8  | 315.16         | -12.69         |

Notes: a, b, c, N are the numbers of C, H, O, N atoms in one molecule, respectively. M<sub>r</sub> represents the relative molecular mass.

**Table S3.** The computational details of water sorption capacity and sorption heat on ADN basic crystal faces and co-crystal faces

| ADN and ADN-based<br>co-crystals | vacuum slab<br>(nm) | a<br>(Å) | b<br>(Å) | c<br>(Å) | $\alpha$<br>(°) | $\beta$<br>(°) | $\gamma$<br>(°) | adsorbed                   |                                 |               |                        |                                |                                       |                            |                            |                 |                                               |                                 |                                       |
|----------------------------------|---------------------|----------|----------|----------|-----------------|----------------|-----------------|----------------------------|---------------------------------|---------------|------------------------|--------------------------------|---------------------------------------|----------------------------|----------------------------|-----------------|-----------------------------------------------|---------------------------------|---------------------------------------|
|                                  |                     |          |          |          |                 |                |                 | surface                    | model                           | model         | phase                  | water sorption                 |                                       |                            | wet air                    |                 | adsorption heat<br>distribution<br>(kcal/mol) |                                 |                                       |
|                                  |                     |          |          |          |                 |                |                 | area<br>(nm <sup>2</sup> ) | density<br>(g/cm <sup>3</sup> ) | volume<br>(Å) | mass<br>(g)            | volume<br>(cm <sup>3</sup> /g) | number of adsorbed<br>water molecules | $n_{\text{ub}}$<br>(mol/g) | $n_{\text{ex}}$<br>(mol/g) | capacity<br>(%) |                                               | density<br>(g/cm <sup>3</sup> ) | average adsorption<br>heat (kcal/mol) |
| ADN 1 0 0                        | 1                   | 23.574   | 11.228   | 36.584   | 90              | 90             | 90              | 2.65                       | 1.36                            | 9683.28       | 1.318*10 <sup>20</sup> | 0.200                          | 66                                    | 8.315*10 <sup>3</sup>      | 8.088*10 <sup>3</sup>      | 14.56           | 1.13*10 <sup>3</sup>                          | 21.846                          | 3.412-35.712                          |
| ADN 0 1 0                        | 1                   | 11.228   | 13.828   | 54.734   | 90              | 90             | 100.4           | 1.55                       | 1.07                            | 12330.20      | 1.318*10 <sup>20</sup> | 0.105                          | 31                                    | 3.906*10 <sup>3</sup>      | 3.787*10 <sup>3</sup>      | 6.82            | 1.13*10 <sup>3</sup>                          | 19.315                          | 1.012-25.812                          |
| ADN 0 0 1                        | 1                   | 13.828   | 23.574   | 37.911   | 90              | 90             | 90              | 3.26                       | 1.07                            | 12358.30      | 1.318*10 <sup>20</sup> | 0.405                          | 102                                   | 1.285*10 <sup>2</sup>      | 1.239*10 <sup>2</sup>      | 22.3            | 1.13*10 <sup>3</sup>                          | 20.771                          | 1.912-36.912                          |
| CL-20ADN 1 0 0                   | 1                   | 29.37    | 20.45    | 42.31    | 90              | 90             | 93.12           | 6.01                       | 1.18                            | 25367.00      | 2.986*10 <sup>20</sup> | 0.347                          | 37                                    | 2.058*10 <sup>3</sup>      | 1.666*10 <sup>3</sup>      | 3.00            | 1.13*10 <sup>3</sup>                          | 11.66                           | -0.088-16.632                         |
| CL-20ADN 0 1 0                   | 1                   | 20.45    | 17.05    | 55.97    | 90              | 90             | 95.55           | 3.49                       | 1.54                            | 19419.30      | 2.986*10 <sup>20</sup> | 0.132                          | 16                                    | 8.898*10 <sup>4</sup>      | 7.406*10 <sup>4</sup>      | 1.33            | 1.13*10 <sup>3</sup>                          | 11.719                          | -1.288-16.712                         |
| CL-20ADN 0 0 1                   | 1                   | 29.37    | 20.45    | 42.31    | 90              | 90             | 93.12           | 6.01                       | 1.38                            | 21585.40      | 2.986*10 <sup>20</sup> | 0.203                          | 25                                    | 1.390*10 <sup>3</sup>      | 1.161*10 <sup>3</sup>      | 2.09            | 1.13*10 <sup>3</sup>                          | 11.876                          | -0.888-18.212                         |
| BTF ADN 1 0 0                    | 1                   | 6.95     | 36.07    | 100.82   | 90              | 90             | 90              | 2.51                       | 1.58                            | 25278.00      | 3.996*10 <sup>20</sup> | 0.118                          | 132                                   | 5.485*10 <sup>2</sup>      | 5.352*10 <sup>2</sup>      | 9.63            | 1.13*10 <sup>3</sup>                          | 40.461                          | 3.912-79.112                          |
| BTF ADN 0 1 0                    | 1                   | 36.07    | 42.00    | 26.25    | 90              | 90             | 90              | 15.15                      | 1.01                            | 39756.20      | 3.996*10 <sup>20</sup> | 0.485                          | 408                                   | 1.695*10 <sup>2</sup>      | 1.640*10 <sup>2</sup>      | 29.52           | 1.13*10 <sup>3</sup>                          | 20.442                          | 1.312-36.912                          |
| BTF ADN 0 0 1                    | 1                   | 42.00    | 6.95     | 86.32    | 90              | 90             | 90              | 2.92                       | 1.59                            | 25205.60      | 3.996*10 <sup>20</sup> | 0.112                          | 131                                   | 5.444*10 <sup>3</sup>      | 5.317*10 <sup>3</sup>      | 9.57            | 1.13*10 <sup>3</sup>                          | 35.02                           | 4.412-62.212                          |
| HMX ADN 1 0 0                    | 1                   | 27.54    | 15.94    | 41.94    | 90              | 90             | 93.91           | 4.39                       | 1.22                            | 18369.90      | 2.232*10 <sup>20</sup> | 0.268                          | 24                                    | 1.786*10 <sup>3</sup>      | 1.483*10 <sup>3</sup>      | 2.67            | 1.13*10 <sup>3</sup>                          | 11.01                           | 0.112-15.712                          |
| HMX ADN 0 1 0                    | 1                   | 15.94    | 15.97    | 62.08    | 90              | 90             | 75.34           | 2.55                       | 1.46                            | 15294.20      | 2.232*10 <sup>20</sup> | 0.127                          | 3                                     | 2.232*10 <sup>4</sup>      | 7.969*10 <sup>5</sup>      | 0.14            | 1.13*10 <sup>3</sup>                          | 8.53                            | 0.012-11.612                          |
| HMX ADN 0 0 1                    | 1                   | 15.97    | 27.54    | 40.68    | 90              | 90             | 100.78          | 4.40                       | 1.27                            | 17576.90      | 2.232*10 <sup>20</sup> | 0.243                          | 21                                    | 1.562*10 <sup>3</sup>      | 1.287*10 <sup>3</sup>      | 2.32            | 1.13*10 <sup>3</sup>                          | 10.99                           | -0.588-15.012                         |
| TNT ADN 1 0 0                    | 1                   | 27.24    | 22.71    | 37.29    | 90              | 90             | 72.61           | 6.19                       | 0.85                            | 22006.50      | 1.866*10 <sup>20</sup> | 0.624                          | 63                                    | 5.606*10 <sup>3</sup>      | 4.901*10 <sup>3</sup>      | 8.82            | 1.13*10 <sup>3</sup>                          | 13.115                          | -0.288-20.512                         |
| TNT ADN 0 1 0                    | 1                   | 22.71    | 9.38     | 67.69    | 90              | 90             | 88.86           | 2.13                       | 1.29                            | 14410.30      | 1.866*10 <sup>20</sup> | 0.2                            | 34                                    | 3.026*10 <sup>3</sup>      | 2.800*10 <sup>3</sup>      | 5.04            | 1.13*10 <sup>3</sup>                          | 14.846                          | -0.512-20.712                         |
| TNT ADN 0 0 1                    | 1                   | 9.38     | 27.24    | 53.56    | 90              | 90             | 83.19           | 2.56                       | 1.37                            | 13583.30      | 1.866*10 <sup>20</sup> | 0.147                          | 18                                    | 1.602*10 <sup>3</sup>      | 1.436*10 <sup>3</sup>      | 2.58            | 1.13*10 <sup>3</sup>                          | 12.614                          | -0.512-19.412                         |
| ETN ADN 1 0 0                    | 1                   | 17.157   | 16.41    | 58.55    | 90              | 90             | 101.64          | 2.82                       | 1.4                             | 16141.80      | 2.265*10 <sup>20</sup> | 0.15                           | 77                                    | 5.645*10 <sup>3</sup>      | 5.476*10 <sup>3</sup>      | 9.86            | 1.13*10 <sup>3</sup>                          | 20.88                           | 1.312-33.512                          |
| ETN ADN 0 1 0                    | 1                   | 16.41    | 25.96    | 44.39    | 90              | 90             | 72.06           | 4.26                       | 1.26                            | 17987.50      | 2.265*10 <sup>20</sup> | 0.246                          | 111                                   | 8.138*10 <sup>3</sup>      | 7.860*10 <sup>3</sup>      | 14.15           | 1.13*10 <sup>3</sup>                          | 18.40                           | 1.512-33.012                          |
| ETN ADN 0 0 1                    | 1                   | 25.96    | 17.16    | 51.78    | 90              | 90             | 102.85          | 4.45                       | 1.01                            | 22488.50      | 2.265*10 <sup>20</sup> | 0.452                          | 164                                   | 1.202*10 <sup>2</sup>      | 1.151*10 <sup>2</sup>      | 20.72           | 1.13*10 <sup>3</sup>                          | 17.93                           | 1.512-34.812                          |
| RDX ADN 1 0 0                    | 1                   | 20.617   | 16.666   | 45.562   | 90              | 90             | 85.04           | 3.44                       | 1.18                            | 15597.10      | 1.840*10 <sup>20</sup> | 0.293                          | 39                                    | 3.520*10 <sup>3</sup>      | 3.189*10 <sup>3</sup>      | 5.74            | 1.13*10 <sup>3</sup>                          | 12.991                          | 0.412-18.712                          |
| RDX ADN 0 1 0                    | 1                   | 16.666   | 17.226   | 51.17    | 90              | 90             | 79.497          | 2.87                       | 1.27                            | 14444.40      | 1.840*10 <sup>20</sup> | 0.238                          | 20                                    | 1.805*10 <sup>3</sup>      | 1.536*10 <sup>3</sup>      | 2.76            | 1.13*10 <sup>3</sup>                          | 11.563                          | -0.188-18.212                         |
| RDX ADN 0 0 1                    | 1                   | 17.226   | 24.04    | 38.188   | 90              | 90             | 73.79           | 4.14                       | 1.21                            | 15185.40      | 1.840*10 <sup>20</sup> | 0.264                          | 22                                    | 1.985*10 <sup>3</sup>      | 1.687*10 <sup>3</sup>      | 3.04            | 1.13*10 <sup>3</sup>                          | 11.956                          | 0.112-17.612                          |

|                 |   |        |        |        |    |    |       |      |      |          |                         |       |    |                        |                        |      |                       |        |               |
|-----------------|---|--------|--------|--------|----|----|-------|------|------|----------|-------------------------|-------|----|------------------------|------------------------|------|-----------------------|--------|---------------|
| TNB ADN 1 0 0   | 1 | 30.45  | 17.49  | 46.96  | 90 | 90 | 90    | 5.33 | 1.43 | 25007.40 | 3.584*10 <sup>-20</sup> | 0.162 | 35 | 1.622*10 <sup>-3</sup> | 1.439*10 <sup>-3</sup> | 2.59 | 1.13*10 <sup>-3</sup> | 10.74  | 1.012-14.612  |
| TNB ADN 0 1 0   | 1 | 17.49  | 18.94  | 76.33  | 90 | 90 | 73.84 | 3.31 | 1.48 | 24285.20 | 3.584*10 <sup>-20</sup> | 0.144 | 47 | 2.178*10 <sup>-3</sup> | 2.015*10 <sup>-3</sup> | 3.63 | 1.13*10 <sup>-3</sup> | 14.915 | 1.312-23.412  |
| TNB ADN 0 0 1   | 1 | 18.94  | 30.45  | 47.31  | 90 | 90 | 90    | 5.77 | 1.31 | 27280.10 | 3.584*10 <sup>-20</sup> | 0.233 | 65 | 3.012*10 <sup>-3</sup> | 2.749*10 <sup>-3</sup> | 4.95 | 1.13*10 <sup>-3</sup> | 14.269 | 1.212-22.212  |
| MATNB ADN 1 0 0 | 1 | 34.866 | 14.259 | 56.375 | 90 | 90 | 90    | 4.97 | 1.39 | 28026.38 | 1.946*10 <sup>-20</sup> | 0.285 | 44 | 3.755*10 <sup>-3</sup> | 3.433*10 <sup>-3</sup> | 6.18 | 1.13*10 <sup>-3</sup> | 12.861 | 0.112-17.912  |
| MATNB ADN 0 1 0 | 1 | 14.259 | 23.487 | 81.241 | 90 | 90 | 90    | 3.35 | 1.46 | 26714.60 | 1.946*10 <sup>-20</sup> | 0.195 | 25 | 2.133*10 <sup>-3</sup> | 1.913*10 <sup>-3</sup> | 3.44 | 1.13*10 <sup>-3</sup> | 15.257 | 0.012-22.612  |
| MATNB ADN 0 0 1 | 1 | 25.059 | 34.866 | 43.084 | 90 | 90 | 90    | 8.74 | 1.03 | 37643.60 | 1.946*10 <sup>-20</sup> | 0.797 | 69 | 5.888*10 <sup>-3</sup> | 4.987*10 <sup>-3</sup> | 8.98 | 1.13*10 <sup>-3</sup> | 12.164 | -0.988-19.012 |
| TNAZ ADN 1 0 0  | 1 | 17.31  | 13.76  | 54.68  | 90 | 90 | 72.92 | 2.38 | 1.35 | 12447.20 | 1.675*10 <sup>-20</sup> | 0.155 | 22 | 2.181*10 <sup>-3</sup> | 2.006*10 <sup>-3</sup> | 3.61 | 1.13*10 <sup>-3</sup> | 13.71  | 0.512-18.512  |
| TNAZ ADN 0 1 0  | 1 | 13.76  | 22.68  | 43.13  | 90 | 90 | 95.51 | 3.12 | 1.25 | 13394.50 | 1.675*10 <sup>-20</sup> | 0.224 | 27 | 2.677*10 <sup>-3</sup> | 2.424*10 <sup>-3</sup> | 4.36 | 1.13*10 <sup>-3</sup> | 13.24  | 0.012-17.712  |
| TNAZ ADN 0 0 1  | 1 | 22.68  | 18.68  | 44.41  | 90 | 90 | 97.29 | 4.24 | 0.92 | 18246.40 | 1.675*10 <sup>-20</sup> | 0.531 | 49 | 4.858*10 <sup>-3</sup> | 4.258*10 <sup>-3</sup> | 7.66 | 1.13*10 <sup>-3</sup> | 12.84  | -0.788-20.712 |

#### Notes:

1. a, b, c,  $\alpha$ ,  $\beta$ ,  $\gamma$ , vacuum slab, model volume, model density are model parameters, and the surface area was calculated as  $a \times b$ . The mass was calculated according to the number of molecules in the model and avogadro's constant.

2. Wet air density was calculated by a simple empirical equation  $\rho = 0.0034843(P - 0.3779\phi P_s) / T$ , where  $\rho$  is the density of air (g/cm<sup>3</sup>),  $\phi$  is the relative humidity (%),  $P_s$  is the partial pressure of saturated vapor (Pa), T is the temperature(K), P is the total pressure of wet air(Pa). The equation was obtained from a Chinese reference published in Mining Safety & Environmental Protection, 2005, 32(4), 49-51. The authors constructed a math model and calculated wet air densities which were compared with the densities of real wet air.

**Table S4.** The computational details of the interaction between water molecule and crystal surface

| Crystal   | surface  | Total energy (kcal/mol) | Water energy (kcal/mol) | Crystal surface energy (kcal/mol) | $E_{int}$ (kcal/mol) | Average $E_{int}$ (kcal/mol) |        |
|-----------|----------|-------------------------|-------------------------|-----------------------------------|----------------------|------------------------------|--------|
| ADN       | 100      | 11401.69                | 4.46                    | 11456.65                          | -59.41               | -59.41                       |        |
|           |          | 11401.69                | 4.46                    | 11456.65                          | -59.41               |                              |        |
|           |          | 11401.69                | 4.46                    | 11456.65                          | -59.41               |                              |        |
|           | 010      | 14118.47                | 6.36                    | 14182.07                          | -69.96               | -70.25                       |        |
|           |          | 14118.47                | 6.36                    | 14182.07                          | -69.96               |                              |        |
|           |          | 14117.34                | 6.09                    | 14182.07                          | -70.82               |                              |        |
|           | 001      | 9887.15                 | 3.02                    | 9932.09                           | -47.96               | -46.30                       |        |
|           |          | 9889.18                 | 2.55                    | 9932.09                           | -45.46               |                              |        |
|           |          | 9889.18                 | 2.55                    | 9932.09                           | -45.46               |                              |        |
|           | ADN/HMX  | 100                     | -1591.78                | 0.28                              | -1574.08             | -17.98                       | -18.69 |
|           |          |                         | -1592.20                | 0.37                              | -1574.08             | -18.49                       |        |
|           |          |                         | -1593.25                | 0.42                              | -1574.08             | -19.59                       |        |
| 010       |          | -1210.70                | 0.59                    | -1192.46                          | -18.84               | -19.10                       |        |
|           |          | -1210.70                | 0.59                    | -1192.46                          | -18.83               |                              |        |
|           |          | -1211.46                | 0.63                    | -1192.46                          | -19.64               |                              |        |
| 001       |          | -1621.52                | 0.24                    | -1604.84                          | -16.92               | -17.91                       |        |
|           |          | -1624.88                | 0.36                    | -1604.84                          | -20.41               |                              |        |
|           |          | -1620.85                | 0.39                    | -1604.84                          | -16.41               |                              |        |
| ADN/CL-20 |          | 100                     | -2351.67                | 0.19                              | -2339.16             | -12.70                       | -16.31 |
|           |          |                         | -2356.00                | 0.33                              | -2339.16             | -17.17                       |        |
|           |          |                         | -2357.91                | 0.30                              | -2339.16             | -19.06                       |        |
|           | 010      | -2658.94                | 0.58                    | -2638.65                          | -20.87               | -19.13                       |        |
|           |          | -2656.68                | 0.40                    | -2638.65                          | -18.43               |                              |        |
|           |          | -2656.29                | 0.44                    | -2638.65                          | -18.08               |                              |        |
| 001       | -2457.69 | 0.42                    | -2438.54                | -19.57                            | -18.89               |                              |        |
|           | -2454.84 | 0.38                    | -2438.54                | -16.69                            |                      |                              |        |
|           |          | -2458.64                | 0.32                    | -2438.54                          | -20.42               |                              |        |

**Table S5.** The parameters and value of the interaction site pairing energy difference of ADN/DPO based on virtual co-crystal screening method

| Energetic Materials | $V_{s,max}$ (kcal/mol) | $\alpha$ | $V_{s,min}$ (kcal/mol) | $\beta$ | E (kJ/mol) | Molar stoichiometry | $E_{cc}$ (kJ/mol) | $\Delta E$ (kJ/mol) |
|---------------------|------------------------|----------|------------------------|---------|------------|---------------------|-------------------|---------------------|
| DPO                 | 41.13                  | 2.14     | -36.11                 | 4.74    | -10.12     | 1:1                 | -24.23            | -0.93               |
|                     |                        |          |                        |         |            | 2:1                 | -48.45            | -11.97              |

Notes:  $V_{s,max}$ : the maximum of molecular electrostatic potential.  $V_{s,min}$ : the minimum of molecular electrostatic potential.  $\alpha$ : H-bond donor parameters.  $\beta$ : H-bond acceptor parameters.  $E_{cc}$ : the interaction site pairing energy of the co-crystal of stoichiometry 1n2m.  $\Delta E$ : the value of the interaction site pairing energy difference.



#### 4. Calculations related to ADN/18C6 co-crystal

According to the computational method above, the 18C6 crown ether is used to investigate the hygroscopicity of co-crystals. Because 18C6 crown ether belong to non-energetic materials with bad detonation performance and the application of ADN/18C6 co-crystal is hard, this section is put into the Supporting information. However, it is great and accessible to study on the hygroscopicity of co-crystal and verify our calculation method. The ADN/18C6 co-crystal has been experimental prepared successfully, which is from the Chinese reference: Preparation and Characterization of ADN/18C6 co-crystal, Chinese Journal of energetic materials, 2018, 26, 545-548.

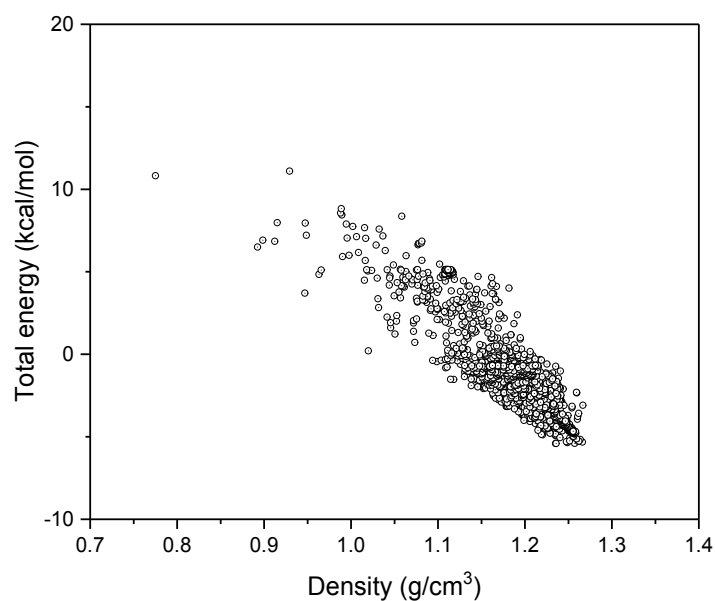

**Figure S28.** Scatter diagrams of lattice energy and density of co-crystal of ADN/18C6

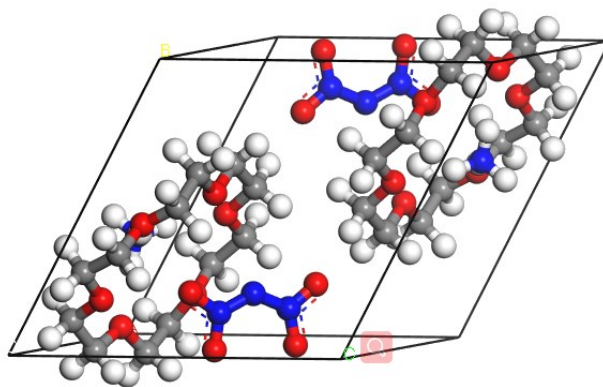

**Figure S29.** The predictive crystal structure of ADN/18C6

**Table S6.** The computational and experimental crystal parameters, density of ADN/18C6

| Space group       | V(Å <sup>3</sup> ) | A(Å)  | B(Å)  | C(Å)  | α(°)  | β(°)   | γ(°)  | ρ (g/cm <sup>3</sup> ) | Type                   |
|-------------------|--------------------|-------|-------|-------|-------|--------|-------|------------------------|------------------------|
| P-1               | 1019               | 11.03 | 10.88 | 10.82 | 66.21 | 60.99  | 87.87 | 1.27                   | Computational-Dreiding |
| C <sub>2</sub> /C | 3869.3             | 23.94 | 8.63  | 20.32 | 90    | 112.87 | 90    | 1.33                   | experimental           |

The predictive crystal structure is difference from the experimental crystal structure, and this difference could be caused by infeasible force field for 18C6 crown ether or caused by the hidden experimental structure. However, the predictive density of 18C6/ADN co-crystal is 1.27g/cm<sup>3</sup> which is closed to the experimental density 1.33g/cm<sup>3</sup>. Additionally, the experimental interaction is similar to predicted interaction. Next, as the Figure S7 shows, the computational water capacity has verified that 18C6 crown ether as co-crystal co-former can tune the hygroscopicity effectively. As the Table S7 and Equation 11, 14 shows the water sorption capacity can be tuned from 18.32% to 0.54% under 35°C, 50% relative humidity. From the view of experiments, the formation of ADN/18C6 make water sorption capacity rate of ADN reduce from 18% to 1.2% under 30°C, 80% relative humidity. The Y-axis data of Fig.5 is from Table S8 and Table S4. The X-axis data of Fig.5 is from BFDH crystal morphology prediction of co-crystal and water total sorption capacity calculations below. As the Table S9 shows, the ΔE of ADN/18C6 is -24.45 kcal/mol, which reveals that the co-crystal of ADN/18C6 can be prepared very likely, and it has been prepared experimentally.

**Table S7.** Water sorption capacity and adsorption heat ADN/18C6 co-crystal basic faces

| ADN and ADN-based Co-crystals | Index of crystal face | Number of adsorbed water molecules | Water sorption capacity (%) | Average sorption heat (kcal/mol) | Sorption heat distribution (kcal/mol) |
|-------------------------------|-----------------------|------------------------------------|-----------------------------|----------------------------------|---------------------------------------|
| 18C6                          | (1 0 0)               | 9                                  | 0.62                        | 9.6                              | -0.29-13.41                           |
|                               | (0 1 0)               | 15                                 | 1.46                        | 10.73                            | -0.19-14.81                           |
|                               | (0 0 1)               | 4                                  | 0                           | 8.49                             | -0.29-10.71                           |

**Table S8.** The computational details of the interaction between water molecule and ADN/18C6 co-crystal surface

| Co-crystal | surface | Total energy (kcal/mol) | Water energy (kcal/mol) | Crystal surface energy (kcal/mol) | $E_{int}$ (kcal/mol) | Average $E_{int}$ (kcal/mol) |        |
|------------|---------|-------------------------|-------------------------|-----------------------------------|----------------------|------------------------------|--------|
| ADN/18C6   | 100     | 367.65                  | 0.25                    | 379.84                            | -12.41               | -12.69                       |        |
|            |         | 369.12                  | 0.22                    | 379.84                            | -10.94               |                              |        |
|            |         | 365.49                  | 0.32                    | 379.84                            | -14.68               |                              |        |
|            | 010     | 571.55                  | 0.36                    | 587.94                            | -16.76               | -14.69                       |        |
|            |         | 576.78                  | 0.20                    | 587.94                            | -11.36               |                              |        |
|            |         | 572.22                  | 0.23                    | 587.94                            | -15.95               |                              |        |
|            |         | -104.12                 | 0.31                    | -87.44                            | -16.99               |                              |        |
|            |         | 001                     | -97.89                  | 0.19                              | -87.44               |                              | -10.64 |
|            |         |                         | -104.12                 | 0.31                              | -87.44               |                              | -16.99 |

**Table S9.** The parameters and value of the interaction site pairing energy difference of ADN/18C6 based on virtual co-crystal screening method

| Co-crystal co-former | $V_{s,max}$ (kcal/mol) | $\alpha$ | $V_{s,min}$ (kcal/mol) | $\beta$ | E (kJ/mol) | Stoichiometry $\gamma$ | $E_{cc}$ (kJ/mol) | $\Delta E$ (kJ/mol) |
|----------------------|------------------------|----------|------------------------|---------|------------|------------------------|-------------------|---------------------|
| 18C6                 | 14.18                  | 0.63     | -61.05                 | 11.90   | -7.47      | 1:1                    | -42.10            | -21.45              |

Notes:  $V_{s,max}$ : the maximum of molecular electrostatic potential.  $V_{s,min}$ : the minimum of molecular electrostatic potential.  $\alpha$ : H-bond donor parameters.  $\beta$ : H-bond acceptor parameters.  $E_{cc}$ : the interaction site pairing energy of the co-crystal of stoichiometry 1n2m.  $\Delta E$ : the value of the interaction site pairing energy difference.

## 5. Predicted ADN/CL-20, ADN/HMX, ADN/18C6 co-crystal morphology by BFDH method and water total sorption capacity

After screening co-crystal co-formers, for evaluating the effect of reducing hygroscopicity accurately, a specify computational number is better than computational scope. Therefore, the problem related to water sorption capacity of co-crystal is simplified. First, BFDH method is used to predict crystal morphology. By the BFDH method, the co-crystal morphology can be predicted, the results of co-crystal is shown in the Table S10 and ADN crystal morphology prediction was listed in the reference 18.

**Table S10.** Results of ADN/CL-20, ADN/HMX, ADN/18C6 co-crystal morphology by the BFDH method.

| Crystal   | Indices of crystal face | Multiplicity | $d_{hkl}$ (Å) | Distance (Å) | Total facet area (%) |
|-----------|-------------------------|--------------|---------------|--------------|----------------------|
| ADN/CL-20 | (0 1 0)                 | 2            | 11.73         | 8.53         | 35.57                |
|           | (0 0 1)                 | 2            | 10.08         | 9.93         | 27.36                |
|           | (1 -1 0)                | 2            | 8.48          | 11.79        | 25.13                |
|           | (0 1 -1)                | 2            | 8.23          | 12.15        | 6.58                 |
|           | (1 -2 0)                | 2            | 6.96          | 14.36        | 1.07                 |
|           | (1 -1 -1)               | 2            | 6.83          | 14.64        | 3.81                 |
|           | (1 0 -1)                | 2            | 6.10          | 16.39        | 0.47                 |
| ADN/HMX   | (0 1 0)                 | 2            | 13.52         | 7.40         | 44.92                |
|           | (0 0 1)                 | 2            | 7.71          | 12.97        | 21.55                |
|           | (1 0 0)                 | 2            | 7.61          | 13.15        | 15.71                |
|           | (1 -1 0)                | 2            | 7.19          | 13.91        | 7.44                 |
|           | (0 1 -1)                | 2            | 6.76          | 14.79        | 0.89                 |
|           | (1 0 1)                 | 2            | 6.23          | 16.04        | 6.00                 |
|           | (1 -1 1)                | 2            | 6.04          | 16.54        | 3.50                 |
| ADN/18C6  | (0 1 0)                 | 1            | 19.52         | 5.12         | 11.69                |
|           | (0 -1 0)                | 1            | 19.52         | 10.25        | 11.69                |
|           | (1 0 0)                 | 1            | 9.46          | 10.57        | 10.67                |
|           | (-1 0 0)                | 1            | 9.46          | 10.57        | 10.67                |
|           | (1 0 1)                 | 1            | 9.04          | 11.07        | 9.03                 |
|           | (-1 0 -1)               | 1            | 9.04          | 11.07        | 9.03                 |
|           | (0 1 1)                 | 1            | 8.54          | 11.71        | 7.295                |
|           | (0 -1 -1)               | 1            | 8.54          | 11.71        | 7.295                |
|           | (0 0 1)                 | 1            | 8.49          | 11.77        | 5.63                 |
|           | (0 0 -1)                | 1            | 8.49          | 11.77        | 5.63                 |
|           | (1 1 1)                 | 1            | 7.81          | 12.81        | 3.34                 |
|           | (-1 -1 -1)              | 1            | 7.81          | 12.81        | 3.34                 |
|           | (1 -1 0)                | 1            | 7.58          | 13.19        | 2.34                 |
| (-1 1 0)  | 1                       | 7.58         | 13.19         | 2.34         |                      |

**Table S11.** The computational water sorption capacity of ADN/CL-20, ADN/HMX, ADN/18C6 co-crystal surface

| Co-crystals | Indices of crystal face | Number of adsorbed water molecules | Water sorption capacity (%) | Average adsorption heat (kcal/mol) | Adsorption heat distribution (kcal/mol) |
|-------------|-------------------------|------------------------------------|-----------------------------|------------------------------------|-----------------------------------------|
| ADN/CL-20   | (1 0 0)                 | 37                                 | 3.00                        | 11.66                              | -0.09-16.63                             |
|             | (0 1 0)                 | 16                                 | 1.33                        | 11.72                              | 0.29-16.71                              |
|             | (0 0 1)                 | 25                                 | 2.09                        | 11.88                              | -0.89-18.21                             |
|             | (1 -1 0)                | 62                                 | 5.47                        | 12.91                              | 0.012-19.01                             |
|             | (0 1 -1)                | 41                                 | 3.42                        | 11.80                              | 0.91-17.61                              |
|             | (1 -2 0)                | 47                                 | 3.78                        | 11.54                              | -0.39-16.51                             |
|             | (1 -1 -1)               | 50                                 | 4.05                        | 11.89                              | 0.41-17.91                              |
|             | (1 0 -1)                | 37                                 | 2.70                        | 10.9                               | -1.39-15.91                             |
| ADN/HMX     | (1 0 0)                 | 24                                 | 2.67                        | 11.01                              | 0.11-15.71                              |
|             | (0 1 0)                 | 3                                  | 0.14                        | 8.53                               | 0.01-11.61                              |
|             | (0 0 1)                 | 21                                 | 2.32                        | 10.99                              | -0.58-15.01                             |
|             | (1 -1 0)                | 33                                 | 3.72                        | 12.47                              | 0.91-18.11                              |
|             | (0 1 -1)                | 34                                 | 3.87                        | 12.50                              | 0.81-17.31                              |
|             | (1 0 1)                 | 17                                 | 1.61                        | 10.82                              | 0.41-15.41                              |
|             | (1 -1 1)                | 52                                 | 5.80                        | 12.63                              | -0.09-21.41                             |
| ADN/18C6    | (1 0 0)                 | 10                                 | 0.76                        | 9.53                               | -0.90-13.20                             |
|             | (0 1 0)                 | 16                                 | 1.59                        | 10.64                              | -0.40-14.60                             |
|             | (0 0 1)                 | 5                                  | 0.06                        | 8.43                               | -1.30-10.80                             |
|             | (1 0 1)                 | 5                                  | 0.14                        | 8.49                               | -0.10-12.00                             |
|             | (0 1 1)                 | 8                                  | 0.51                        | 7.57                               | -0.40-10.70                             |
|             | (1 1 1)                 | 18                                 | 1.18                        | 9.23                               | -0.80-14.20                             |
|             | (1 -1 0)                | 15                                 | 0.44                        | 9.19                               | -0.70-13.20                             |

Then, it is supposed that the hygroscopicity of crystal is originated from the hygroscopicity of different crystal surface. It can be express as Eq.11, where the  $\theta_i$ ,  $W_i$  refers to the percent of crystal surface area and the computational water sorption capacity of crystal surface, respectively.

$$W = \sum (\theta_i \cdot W_i) \quad (11)$$

The computational process of the water total sorption capacity of ADN, ADN/CL-20, ADN/HMX, ADN/18C6 co-crystal are expressed as respectively.

$$W_{ADN} = \sum (\theta_i \cdot W_i) = \frac{21.53 \times 14.56 + 20.10 \times 11.82 + 20.61 \times 21.26 + 29.50 \times 21.46 + 8.26 \times 25.33}{100} = 18.32\% \quad (12)$$

$$W_{ADN/CL-20} = \sum (\theta_i \cdot W_i) = \frac{35.57 \times 1.33 + 27.36 \times 2.09 + 25.13 \times 5.47 + 6.58 \times 3.42 + 1.07 \times 3.78 + 3.81 \times 4.05 + 0.47 \times 2.70}{100} = 2.85\% \quad (13)$$

$$W_{ADN/HMX} = \sum (\theta_i \cdot W_i) = \frac{44.92 \times 0.14 + 21.55 \times 2.32 + 15.71 \times 2.67 + 7.44 \times 3.72 + 0.89 \times 3.87 + 6.00 \times 1.61 + 3.50 \times 5.80}{100} = 1.59\% \quad (14)$$

$$W_{ADN/18C6} = \sum (\theta_i \cdot W_i) = \frac{11.69 \times 2 \times 1.46 + 10.67 \times 2 \times 0.62 + 9.03 \times 2 \times 0.01 + 7.295 \times 2 \times 0 + 5.63 \times 2 \times 0 + 3.34 \times 2 \times 0.92 + 2.34 \times 2 \times 0}{100} = 0.54\% \quad (15)$$

The Y-axis data of Figure 5 is from this section.

## 6. References

- 1 U. Teipel, *Energetic Materials. Particle processing and characterization*, WILEY-VCH, 2005.
- 2 *Handbook of New Energetic Compound Data*, Chemical Industry Press, 2016.
- 3 M. Kunzel, R. Matyas, O. Vodochodsky, J. Pachman, *Cent. Eur. J. Energ. Mater.*, 2017, **14**, 418-429.
- 4 *Handbook of Energetic Materials and the Related Compounds*, National Defense Industry Press, 2010.
- 5 M. M. Li, F. S. Li, R. Q. Shen, X. D. Guo, *J. Hazard. Mater.*, 2011, **186**, 2031-2036.
- 6 R. R. Sanghavi, P. J. Kamale, M. A. R. Shaikh, S. D. Shelar, K. S. Kumar, A. Singh, *J. Hazard. Mater.*, 2007, **143**, 532-534.
- 7 Y. Ma, L. Y. Meng, H. Z. Li, C. Y. Zhang, *CrystEngComm*, 2017, **19**, 3145-3155.
- 8 X. F. Wei, Y. Ma, X. P. Long, C. Y. Zhang, *CrystEngComm*, 2015, **17**, 7150-7159.
- 9 Y. Ma, A. B. Zhang, X. G. Xue, D. J. Jiang, Y. Q. Zhu, C. Y. Zhang, *Cryst. Growth Des.*, 2014, **14**, 6101-6114.
- 10 P. Politzer, J. S. Murray, *Cryst. Growth Des.*, 2015, **15**, 3767-3774.
- 11 A. R. Oganov, C. J. Pickard, Q. Zhu, R. J. Needs, *Nat. Rev. Mater.*, 2019, **4**, 331-348.
- 12 S. L. Mayo, B. D. Olafson, W. A. Goddard, *J. Phys. Chem.*, 1990, **94**, 8897-8909.
- 13 Y. H. Lan, J. X. Zhai, D. H. Li, R. J. Yang, *J. Mater. Sci.*, 2015, **50**, 4933-4939.
- 14 M. Vasileiadis, C. C. Pantelides, C. S. Adjiman, *Chem. Eng. Sci.*, 2015, **121**, 60-76.
- 15 M. Zhang, Z. Z. Liang, F. Wu, J. F. Chen, C. Y. Xue, H. Zhao, *J. Cryst. Growth*, 2017, **467**, 47-53.
- 16 G. R. Desiraju, *Angew. Chem. Int. Ed.*, 2007, **46**, 8342-8356.
- 17 R. M. Bhardwaj, J. A. McMahon, J. Nyman, L. S. Price, S. Konar, I. D. H. Oswald, C. R. Pulham, S. L. Price, *J. Am. Chem. Soc.*, 2019, **141**, 13887-13897.
- 18 X. J. Chen, L. C. He, X. R. Li, Z. Y. Zhou, Z. Q. Ren, *J. Phys. Chem. C*, 2019, **123**, 10940-10948.
- 19 O. Talu, A. L. Myers, *AIChE J.*, 2001, **47**, 1160-1168.
- 20 M. Ito, K. Nambu, A. Sakon, H. Uekusa, E. Yonemochi, S. Noguchi, K. Terada, *J. Pharm. Sci.*, 2017, **106**, 859-865.
- 21 M. Murase, R. Ohta, *J. Phys. Chem. C*, 2019, **123**, 13246-13252.
- 22 D. Musumeci, C.A. Hunter, R. Prohens, S. Scuderi, J.F. McCabe, *Chem. Sci.*, 2011, **2**, 883-890.
- 23 T. Grecu, C.A. Hunter, E.J. Gardiner, J.F. McCabe, *Cryst. Growth Des.*, 2014, **14**, 165-171.
- 24 M. K. Corpinot, D. K. Bucar, *Cryst. Growth Des.*, 2019, **19**, 1426-1453.
- 25 M. C. Etter, *J. Phys. Chem.*, 1991, **95**, 4601-4610.
